## 1 Front Matter

### 2 Title

3 Quantification of fast molecular adhesion by fluorescence footprinting

### 4 Authors

5 Adam B. Yasunaga<sup>1</sup>, Isaac T.S. Li<sup>1\*</sup>

### 6 Affiliations

7 <sup>1</sup>Department of Chemistry, The University of British Columbia, Kelowna, BC, Canada

8 \*Corresponding author. Email: [isaac.li@ubc.ca](mailto:isaac.li@ubc.ca)

### 9 Abstract

10 Rolling adhesion is a unique process in which the adhesion events are short-lived and  
11 operate under highly non-equilibrium conditions. These characteristics pose a challenge in  
12 molecular force quantification, where *in situ* measurement of such forces cannot be  
13 achieved with most molecular force sensors that probe near equilibrium. In this report, we  
14 demonstrated a quantitative adhesion footprint assay combining DNA-based non-  
15 equilibrium force probes and modelling to measure the molecular force involved in fast  
16 rolling adhesion. We were able to directly profile the ensemble molecular force  
17 distribution during rolling adhesion with a dynamic range between 0 – 18 pN. Our results  
18 showed that the shear stress driving bead rolling motility directly controls the molecular  
19 tension on the probe-conjugated adhesion complex. Furthermore, the shear stress can steer  
20 the dissociation bias of components within the molecular force probe complex, favouring  
21 either DNA probe dissociation or receptor-ligand dissociation.

## 22 MAIN TEXT

### 23 Introduction

24 The rolling adhesion cascade is a crucial phenomenon in the immune system where  
25 leukocytes rapidly roll on the blood vessel walls to reach the site of infection (1, 2).  
26 Rolling adhesion is mediated by the interaction between P-selectin on the surface of  
27 endothelial cells, and P-selectin glycoprotein ligand-1 (PSGL1) on the surface of  
28 leukocytes (2, 3). Selectins exhibit both a high on and off rate with high affinity allowing  
29 for rapid formation and dissociation of P-selectin/PSGL1 interactions during rolling (4–6).  
30 This interaction has also been shown to display a catch-slip bond response to tensile force,  
31 where bond lifetime initially increases (catch bond) with force followed by a decrease in  
32 lifetime (slip bond) after a threshold force has been crossed (2, 7, 8). In addition to rolling,  
33 PSGL1 acts as a mechanosensitive receptor that, upon engagement with P-selectin,  
34 triggers the subsequent firm adhesion stage of the rolling adhesion cascade (1, 3, 9). With  
35 force playing a role in both adhesion and signaling, it is imperative to understand the  
36 dynamics of tensile force on the P-selectin/PSGL1 interaction under physiological rolling  
37 conditions. However, no direct experimental measurement of these forces is available due  
38 to challenges in quantifying forces in such a dynamic system, where individual adhesion  
39 bonds are only briefly (millisecond time scale) subjected to tension once.

46 Although the forces on the P-selectin/PSGL1 interaction have not been directly  
47 investigated during cell rolling, the force response of the interaction has been studied *in*  
48 *vitro* at the single-molecule level (10). This has been accomplished using atomic force  
49 microscopy (AFM) (4, 7, 11, 12), biomembrane force probe (BFP) (13) and optical  
50 tweezers (OT) (10, 14). In each of these approaches, the force response of the interaction  
51 is studied by bringing a receptor-coated surface and a ligand-coated surface together and  
52 then retracting one surface to apply a tensile force on the existing interaction(s).  
53 Depending on the technique used to probe the P-selectin/PSGL1 interaction, the rupture  
54 forces have been reported to be between 0.08 and 250pN (10). However, without direct  
55 measurement in a real cell rolling system, it is unknown what force range reported by *in*  
56 *vitro* measurements are physiologically relevant. In addition, the complex adhesion tether  
57 geometry and cell rolling dynamics makes it difficult to accurately replicate the force  
58 loading history by instrument-based force-spectroscopy techniques. Therefore, an  
59 experimental approach to directly measure molecular adhesion forces in a rolling adhesion  
60 system is needed. Although currently existing molecular force sensors have been deployed  
61 successfully in measuring tension in cell adhesion involving integrins (15, 16), T-cell  
62 receptors (17, 18), cadherins (19–21), and cytoskeletal proteins (22), these adhesion events  
63 occur on a time-scale (minutes) (23) much slower comparing to those involving selectin-  
64 family proteins in cell rolling (millisecond) (6, 23, 24). Because of the fast dynamics of  
65 these adhesion interactions, there is no currently available molecular force quantification  
66 technique compatible with rolling adhesion. This is a fundamental challenge in molecular  
67 and cellular force quantification, as selectins are one of the major classes of cell adhesion  
68 molecules (CAMs), and accurate force measurement and control have profound  
69 implication in understanding their coupled signalling pathways in disease pathophysiology  
70 (1, 9, 25).

71 Current molecular force sensors (MFS) fall into three general categories based on their  
72 force sensing mechanisms, as reviewed previously (26). These categories are defined as  
73 reversible analog, reversible digital, and irreversible sensors. Reversible MFSs are not  
74 suitable for studying rolling adhesion because the signal-to-noise ratio is insufficient to  
75 measure rapid, non-equilibrium, force changes during the short selectin-mediated bond  
76 formation and dissociation at the surface density required to sustain rolling adhesion.  
77 Irreversible MFSs, on the other hand, are well-suited for non-equilibrium processes as  
78 they can produce a permanent record of a single adhesion event with significantly higher  
79 signal-to-noise ratio. These desirable properties led to the development of the adhesion  
80 footprint assay (27) based on tension gauge tether (TGT) (28), a DNA-based non-  
81 equilibrium force sensor, where the spatial distribution of rolling adhesion was recorded  
82 and mapped. However, quantification of adhesion force was limited, as the fluorescence  
83 intensity in an “adhesion footprint” only represents the number of adhesion events  
84 rupturing the TGT, and does not quantify the molecular forces on the P-selectin/PSGL1  
85 interactions (26). In this article, we developed a framework to quantify the adhesion forces  
86 using adhesion footprint assay. Using a bead rolling adhesion model system, we obtained  
87 the distribution of instantaneous molecular adhesion force and rupture force of the P-  
88 selectin/PSGL1 interaction during rolling adhesion.

89 **Results**

90 **Bead rolling adhesion as a model system**

91 To investigate the forces involved in rolling adhesion, we used bead rolling as our model  
92 system. This was accomplished by rolling PSGL1 coated polystyrene beads on a surface  
93 functionalized with P-selectin conjugated TGTs (Fig. 1A). By using beads in place of live  
94 cells, we had a consistent and well-defined system allowing us to focus solely on the  
95 molecular forces on the P-selectin/PSGL1 interactions. Unlike with cells, beads allowed  
96 us to make the assumptions that the shape of the beads remains the same regardless of the  
97 applied force, and there is a uniform distribution of PSGL1 receptors on the bead surface.  
98 With these assumptions, we were able to develop a model of bead rolling adhesion that is  
99 critical to the association of the “adhesion footprint” fluorescence intensity to molecular  
100 force on the P-selectin/PSGL1 interactions.

101 The bead rolling assay was performed by flowing PSGL1 coated beads through a parallel  
102 plate flow chamber functionalized by TGTs conjugated to P-selectin. The shear stress in  
103 the chamber was controlled by a syringe pump, allowing for a user-defined sequence of  
104 shear stresses to be applied. A darkfield microscope was used to record and track the  
105 rolling beads (Fig. 1B) and an inverted total internal reflection fluorescence (TIRF)  
106 microscope was used to image the fluorescence tracks left on the surface by the beads  
107 (Fig. 1A, C). We hypothesized that increasing shear stress on a rolling bead leads to an  
108 increase in molecular adhesion forces, shorter adhesion bond lifetime, and faster rolling  
109 velocity. Therefore, in this study, beads were subjected to various physiological shear  
110 stresses to probe the physiological P-selectin/PSGL1 adhesion force during rolling  
111 adhesion. At each shear stress, both velocity and fluorescence intensity data were analyzed  
112 and used in conjunction with a model of bead rolling adhesion to quantify the molecular  
113 forces on the P-selectin/PSGL1 interaction.

114 By doing single particle tracking analysis of darkfield bead rolling movies, we showed  
115 that not only does the bead roll on the P-selectin/TGT surface, the rolling adhesion is  
116 stable, as seen from the uniform rolling velocity of a single bead (Fig. 1A). While it is  
117 possible to track a single bead over multiple steps of shear stresses under 10x  
118 magnification, doing so at 100x magnification under TIRF imaging condition is  
119 challenging. Hence, instead of live tracking, we scanned the surface and stitched 2000-  
120 3000 individual TIRF images to form a large image composed of many tracks, each over  
121 multiple cycles of shear stress steps (Fig. 1C). Individual tracks were detected by custom-  
122 written code, and isolated for subsequent analysis.

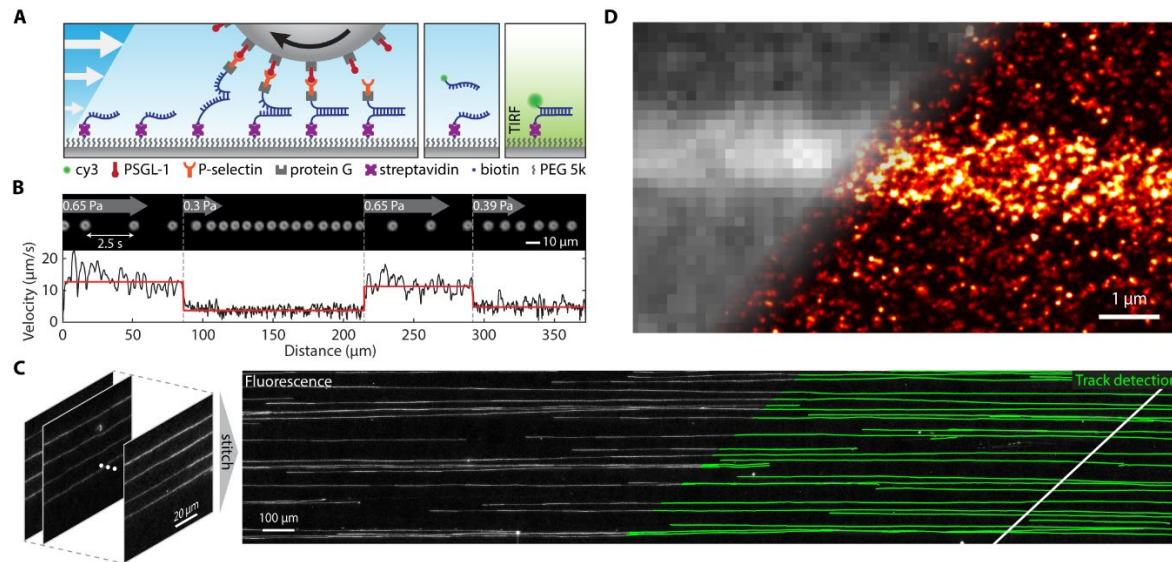

**Fig. 1. Bead rolling adhesion with adhesion footprint assay.** (A) Schematic of the rolling adhesion footprint assay. A PSGL1 coated bead rolls on a surface by binding to P-selectin and eventually rupturing the conjugated DNA duplex, leaving a single stranded DNA (ssDNA) on the surface corresponding to the precise locations of each adhesion event. This adhesion footprint assay leaves a trail of ssDNA on the surface that can be fluorescently labeled with a complementary strand and further imaged with TIRF microscopy to observe the tracks left by the rolling beads. (B) Darkfield imaging of bead rolling under altering steps of shear stress. The top image imposes snapshots of a bead every 2.5 seconds in response to the different shear stresses. The bottom panel shows the corresponding instantaneous velocity (black) and mean velocity (red). (C). A stitched image showing the fluorescence adhesion footprint tracks (left) that are observed after PSGL1 beads roll on a P-selectin/TGT surface. Individual tracks (green lines) are detected (right), enabling isolation and analysis of the fluorescence intensity trajectory of individual beads. (D). The diffraction limited and DNA PAINT super-resolution image of a single fluorescence track.

The adhesion footprint assay is intrinsically compatible with super-resolution DNA PAINT, as the DNA unzipping leaves a single stranded DNA on the surface that can be imaged directly by DNA PAINT imaging strands. Doing so allowed us to directly visualize individual ruptured TGT on the surface (Fig. 1D). The density of ruptured TGT in a typical track in our experiment ranges between  $\sim 10$  to  $40$  per  $\mu\text{m}^2$  (excluding background) while the total surface density of TGT is estimated to be  $\sim 2000$  per  $\mu\text{m}^2$ . This is a clear demonstration of the high signal-to-noise ratio of TGT-based adhesion footprint assay and the necessity of this approach for fast cell adhesion studies. Given the rapid motility rolling bead/cell, the receptors have little time to form tether with ligands. Hence, even though both surfaces have saturating density of receptors and ligands, only 0.5% to 2.0% of all TGTs form tethers with the bead to get ruptured. To distinguish the signal and quantify forces on such a small proportion of tethered force sensors among a large background of non-tethered force sensors would pose a significant detection challenge for force sensors measuring equilibrium forces using FRET or fluorescence quenching.

### **Shear stress controls bead rolling velocity and track fluorescence intensity**

Shear flow enables the rolling adhesion by applying an overall force to the bead, which redistributes among adhesion tethers. It is the stochastic breaking of these tethers that enables a bead to roll in the direction of the flow. The observed rolling velocity is directly

157 related to the force on the adhesive interactions during rolling adhesion; and by changing  
158 the shear stress on the beads, we can effectively change the force on the P-selectin/PSGL1  
159 interactions. Greater shear stress translates directly to greater tension among the adhesion  
160 tethers. In an effort to understand the molecular force on catch-bonds in a real rolling  
161 system under physiological condition, we changed shear stress to put the system in force  
162 regimes where either the catch-bond or the slip-bond behaviours dominated.

163 First, we track the rolling velocity of individual beads to understand its response to shear  
164 stress. A syringe pump was programmed to apply a custom shear flow profile (Fig. 2A).  
165 Instantaneous rolling velocity (Fig. 2B) of an individual bead was determined by tracking  
166 its centroid using a custom-written MATLAB code. Our analysis showed that bead rolling  
167 velocity scales exponentially to shear stress at both the single bead and population levels  
168 (Fig. S1). This relationship is primarily dictated by the force-dependent dissociation of  
169 either TGT or P-selectin/PSGL1 within the complex and exhibits an apparent slip-bond  
170 behaviour. The mean velocity ( $v$ ) of a steadily rolling bead is inversely proportional to the  
171 mean life-time of the adhesion complex due to simple geometry, while the force-  
172 dependent life-time ( $\tau_{mol}$ ) of a slip bond is characterized by the following exponential  
173 function, where  $\tau_{mol}^0$  is the zero-force lifetime,  $F$  is the molecular tension,  $x^\ddagger$  is the  
174 distance to dissociation barrier:

$$\tau_{mol} = \tau_{mol}^0 \exp\left(-\frac{Fx^\ddagger}{k_B T}\right) \quad (1)$$

176 Given that the shear stress ( $\tau_{shear}$ ) is directly proportional to the molecular forces on  
177 individual adhesion bonds under steady-state rolling, it follows that the mean rolling  
178 velocity is an exponential function of shear stress, where  $c_1$  and  $c_2$  are constants:

$$v = c_1 \exp(c_2 \tau_{shear}) \quad (2)$$

180 The agreement between this simple explanation and the experimental result on the  
181 exponential nature of  $v$  vs.  $\tau_{shear}$  seems suggest that the rolling adhesion system here  
182 operates primarily in a regime where the force-dependent life-time of slip-bonds  
183 dominates. However, no direct relation between the behaviour and the molecular forces in  
184 these systems can be established, even though whole cell/bead tracking has been  
185 traditionally used to infer what is happening at the molecular scale. This calls for a direct  
186 measurement of the molecular forces involved in rolling adhesion.

187 Unlike single molecule studies where force-extension on a single adhesion bond can be  
188 directly measured, at any given time, many adhesion bonds stretched to different tension  
189 are simultaneously involved in rolling adhesion. This makes it challenging to directly  
190 measure the magnitude of forces on individual molecules. Instead, our method focuses on  
191 measuring the distribution of molecular forces, which provides meaningful insight on the  
192 force evolution history of individual bonds during rolling. To investigate this distribution,  
193 we applied the adhesion footprint assay (27) (Fig. 1A) where P-selectin functionalized  
194 TGTs were used to fluorescently report and quantify molecular adhesion forces. The  
195 differential force-dependent dissociation kinetics of P-selectin/PSGL1 interaction vs.  
196 dsDNA unzipping leads to dissociation probabilities biased towards either P-  
197 selectin/PSGL1 (under low force), or dsDNA unzipping (under high force). Therefore, a  
198 single bead rolling on P-selectin functionalized TGTs at different shear stress will produce  
199 a trail of ruptured TGTs behind it (Fig. 1A), with densities dependent on the shear stress.

200 Following each bead rolling experiment, the ruptured TGTs were fluorescently labeled  
201 (Fig. 1A) to reveal the tracks left on the surface by the rolling beads (Fig. 1C).

202 The intensity of these tracks is directly proportional to the number of ruptured TGTs and  
203 hence will lead us to dissecting the molecular force distribution. The fluorescence tracks  
204 were imaged with TIRF microscopy and each track was isolated and analyzed with  
205 custom-written MATLAB code. Upon observing the fluorescence tracks, it was seen that  
206 each track had a pattern of bright and dim segments along the length of the tracks (Fig.  
207 2C). Similar to rolling velocity, the fluorescence intensity along the length of each track  
208 (Fig. 2D) also mimicked the pattern of the flow series used to roll the beads. Because bead  
209 rolling movies are collected at a different magnification on a different microscope, they  
210 cannot be directly correlated to the fluorescence tracks. In order to investigate the  
211 relationships between fluorescence intensity, bead velocity, and shear stress of a single  
212 bead, this information needs to be derived directly from individual fluorescence tracks. To  
213 do so, each track was split into segments, each corresponding to a single shear stress (Fig.  
214 2A) where the mean fluorescence intensity (Fig. 2F) was calculated. In addition, the mean  
215 rolling velocity was calculated for each segment based on segment length and the duration  
216 for which the corresponding shear stress was applied. In doing this, a second set of  
217 velocity data was generated strictly from the fluorescence track data. The single-bead  
218 velocity distribution from fluorescent track analysis agrees with the single-bead velocity  
219 distribution from tracking the bead movie (Fig. 2G) with a strong positive correlation ( $R =$   
220  $0.99$ ,  $p < 0.001$ ). Therefore, the velocity data extracted from the fluorescence tracks was  
221 accurate and was used for all subsequent analysis.

222 Analysis of the fluorescence tracks showed that track intensity increases monotonically to  
223 shear stress (Fig. 2H). As the fluorescence intensity is dependent on the surface density of  
224 ruptured TGTs, contrast in the fluorescence intensity indicates that our method is sensitive  
225 enough to molecular force changes within range of our shear stresses. Given our previous  
226 work, higher molecular force corresponds to greater amount of ruptured TGT, leading to  
227 greater fluorescence intensity. Hence, the result is consistent with our expectation.  
228 However, fluorescence intensity only shows the relative overall change in molecular force.  
229 It does not provide a direct quantification of the distribution of molecular forces.  
230 Therefore, a bead rolling adhesion model taking into account the force-dependent  
231 dissociation behaviour of serially connected TGT and P-selectin/PSGL1 is needed to  
232 quantify the molecular forces involved in rolling adhesion.

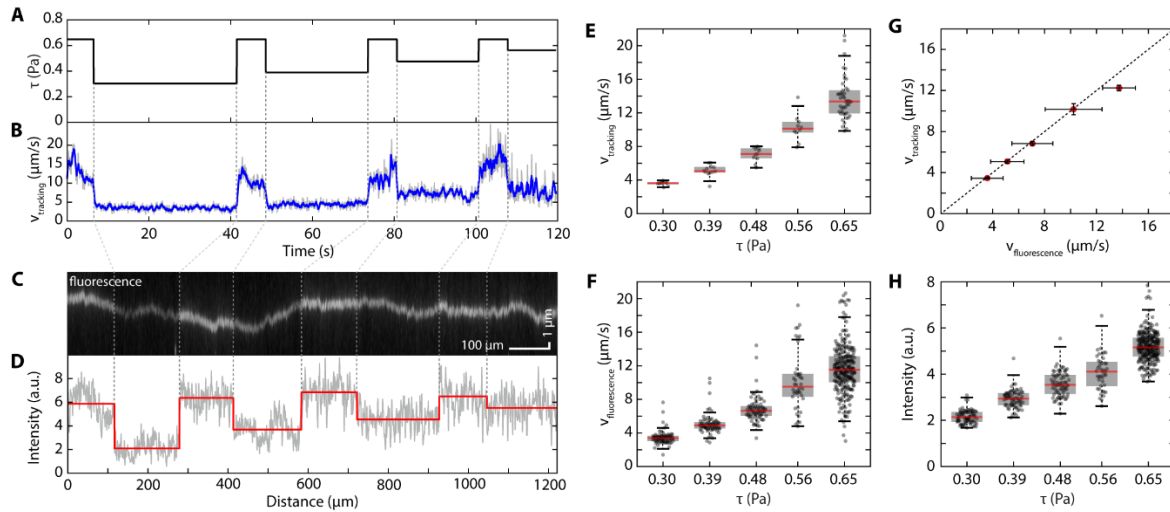

**Fig. 2. Shear stress dictates bead rolling velocity and fluorescence track intensity.** (A) Syringe pump-controlled flow series applied to the rolling beads. (B) Population mean rolling velocity of PSGL1 coated beads over time resulting from the applied flow series shown in (A). (C) Representative fluorescence track imaged with TIRF after rolling beads on the TGT/P-selectin surface with the flow series shown in (A). (D) Intensity trace along the length of the track showing raw data in gray and the mean intensity at each shear stress from (A) in red. (E) Mean tracking bead velocity as a function of shear stress. Tracking bead velocity was determined through single particle tracking of rolling beads. (F) Mean fluorescence bead velocity as a function of shear stress. Fluorescence bead velocity was determined by the length of each segment seen in a fluorescence track and the duration corresponding to the segments. (G) Scatter plot of fluorescence velocity vs tracking bead velocity showing a positive correlation ( $r = 0.99$ ,  $p < 0.001$ ) with error bars representing standard error of the mean. (H) Fluorescence track intensity as a function of shear stress.

### **Modelling bead rolling in the adhesion footprint assay**

In order to determine the magnitude of the molecular force from the experimentally observed fluorescence intensity, we developed a robust model to describe the molecular force distribution during bead rolling adhesion. The model assumes that a hard-sphere rolls at a constant velocity (Fig. 3A), which is consistent with our experimental observation (Fig. 2B). Without solving Newtonian mechanics, this assumption leads to a steady-state condition that allows us to numerically solve the evolution of molecular force across individual adhesion tethers. Under this steady-state condition, every molecular tether follows the same end-to-end extension profile over time,  $d(t)$  as defined entirely by geometry (Fig. 3A):

$$d(t) = \sqrt{\left(vt - R \sin \frac{vt}{R}\right)^2 + R^2 \left(1 - \cos \frac{vt}{R}\right)^2} \quad (3)$$

where  $R$  is the radius of the bead and  $v$  is the rolling velocity. Hence, the force loading history  $f(t)$  of each adhesion bond can be determined by the numerical evaluation of the force-extension profile  $f(d)$  of the molecular tether. Individual components of the molecular tether used in our experiment were modelled using worm-like-chain parameters from the literature. Next, we derived (see Supplementary Materials) the probability density function  $P(f)$  to observe an individual adhesion bond at a particular force (Fig. 3B), under the steady-state force loading and dissociation condition:

268

$$P(f) = C_1 \exp\left(-\int_0^f \frac{\dot{g}(f)}{\tau(f)} df\right) \quad (4)$$

269

270

271

272

273

274

where  $\tau(f)$  is the force-dependent dissociation of an adhesion complex,  $g(f)$  is the inverse function of  $f(t)$ ,  $\dot{g}(f)$  is the derivative of  $g(f)$  with respect to force  $f$ , and  $C_1$  is the normalization constant. Given uniform surface densities of receptors on both the bead and substrate in our experiment settings,  $P(f)$  provides the generalized steady-state instantaneous force distribution. Given the force history of each adhesion bond, the probability density of the bond rupture force can be evaluated (Fig. 3D):

275

$$P_r(f) = \frac{C_2}{\tau(f)} \exp\left(-\int_0^f \frac{\dot{g}(f)}{\tau(f)} df\right) \quad (5)$$

276

Where  $C_2$  is the normalization constant.

277

278

279

280

281

282

283

284

285

286

287

288

289

290

291

292

293

294

295

296

297

As the bead rolling velocity increases, the instantaneous force distribution quickly shifts up, capped by the unzipping of the reporting DNA at  $\sim 15$  pN (Fig. 3B). The rupture force shows a bimodal distribution characteristic of catch-bond, with the distribution shifting towards the higher force mode as rolling velocity increases (Fig. 3D). The adhesion interaction between P-selectin and PSGL1 was described by a catch-bond, where the force-dependent bond life-time increases with force initially before it falls off again like a classic slip bond (2, 8). The DNA reporter in series with the P-selectin/PSGL1 bond modifies the overall adhesion characteristic, but only at forces above 13.6 pN, where the life-time of the DNA is lower than the P-selectin/PSGL1 interaction (Fig. 3D). At forces below 13.6 pN, the overall adhesion characteristic remains near identical to the P-selectin/PSGL1 interaction (Fig. 3D). Hence, in the adhesion footprint assay, the modified adhesion complex involving the DNA reporter remain a catch-bond up to 13.6 pN. Because of this catch-bond characteristic, both expected values of the instantaneous and rupture forces increase as the rolling velocity increases in a highly non-linear fashion (Fig. 3C). Below 13.6 pN, the life-time of P-selectin/PSGL1 is significantly shorter than the DNA reporter, making them statistically much more likely to rupture. Therefore, at low rolling velocity, the bond rupture event is predominantly P-selectin/PSGL1. Similarly, at high rolling velocity, the unzipping of DNA reporter dominates the overall bond rupture events (Fig. 3E). The greater fraction of DNA unzipping at high velocity correspond to the higher force peak  $\sim 15$  pN in the rupture force distribution (Fig. 3D), while the bond rupturing events happening  $< 5$  pN are due to P-selectin/PSGL1 dissociation.

298

299

300

301

302

303

304

Because the fluorescence intensity in the adhesion footprint assay is directly proportional to the amount of unzipped DNA reporters, it provides a direct link between experimental observables and model parameters. The tracks' normalized fluorescence intensities as a function of their corresponding rolling velocity is in good agreement with our model (Fig. 3F). Therefore, through this model, a calibration curve can be established (Fig. 3G) to relate the fluorescence intensity along a track to the molecular forces the bead experiences at any given point (Fig. 3G).

305

306



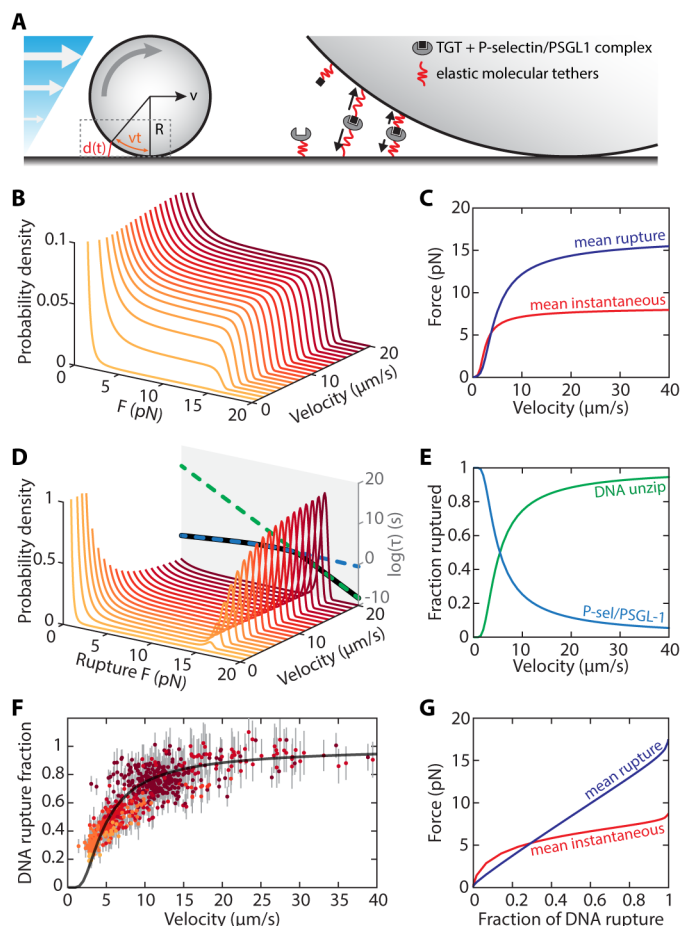

**Fig. 3. Modelling force distribution in the adhesion footprint assay.** (A) The steady-state bead rolling model with parameters indicated in the schematic. The zoomed-in picture shows the molecular tethers are being stretched and dissociate as the bead roll forward, mimicking a force-extension experiment that acts on many tethers. (B) Instantaneous force distribution at different bead rolling velocity. (C) The expected instantaneous (red) and rupture (blue) force as a function of bead velocity. (D) Rupture force distribution at different bead rolling velocity. The force-dependent life-time of P-selectin/PSGL1 (blue dash), DNA reporter unzipping (green dash), and the overall bond rupture profile (black). (E) The fraction of bond rupture due to DNA unzipping and P-selectin/PSGL1 dissociation at different bead velocities. (F) Normalized, track fluorescence intensity as a function of velocity of individual beads, each data point is coloured by the shear stress it experiences under. Error bars indicate standard deviation of the fluorescence intensity along each track. Solid black line is the calculated DNA rupture fraction as a function of bead velocity from the model. (G) The expected rupture (blue) and instantaneous (red) force as a function of the DNA rupture fraction, predicted by the model. This is essentially a force-fluorescence calibration curve.

### **Quantitative mapping of molecular force along a single track**

We isolated a single fluorescence track (Fig. 4B) to reconstruct the history of molecular adhesion force governing the rolling adhesion of a single bead. First, we straightened the track and removed the background fluorescence such that the fluorescence intensity is directly proportional to the amount of unzipped DNA reporters (Fig. 4C). Different segments along the track corresponding to different shear stress are clearly visible as bands in the straightened image (Fig. 4C). The transition points between two adjacent shear stress were determined by binary segmentation (29) of the mean intensity along the track (Fig. 4D). Determining the starting and end positions of each constant shear stress segment allows us to measure the mean fluorescence intensity and mean velocity of each

segment (Fig. 4E), which can be fitted to our model with the diameter of the bead being the only fitting parameter. By doing so, the fluorescence-to-force calibration curve was established specifically for a single-bead track (Fig. 4F). Due to the size variation among the beads, it is necessary to determine this calibration curve for each single-bead track. The sizes of beads affect the reconstruction of molecular force because their different geometries lead to different force-loading profiles, even if they travel at the same linear velocity. Different force loading profile will subsequently lead to different instantaneous and rupture force distributions, and ultimately the molecular force reconstruction. From the model, the mean instantaneous force increases non-linearly with normalized fluorescence intensity (equivalent to the fraction of DNA rupture), while the mean rupture force scales nearly linearly (Fig. 4F). Hence, this force calibration curve allows us to reconstruct and map the mean and rupture force along the track (Fig. 4G, H).

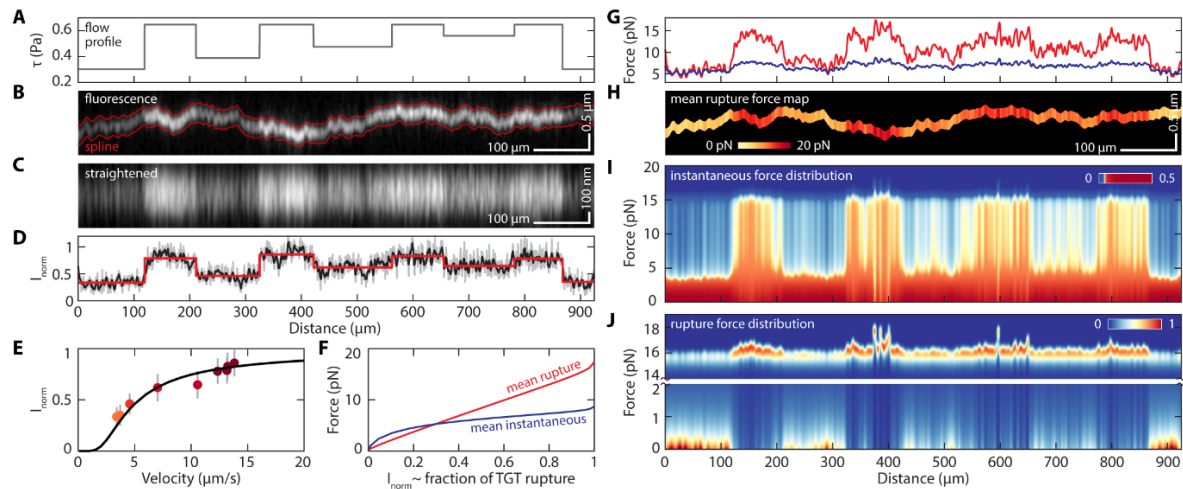

**Fig. 4. Mapping molecular force along a single rolling adhesion track.** (A) Shear stress profile over time. (B) A single fluorescence track made by a bead rolling under this the flow profile shown in (A) where the spline is marked in red. (C) Straightened fluorescence track seen in (B) showing regions of high and low fluorescence intensity corresponding to the shear stress profile in (A). (D) The normalized total fluorescence intensity along the track (raw, gray; smoothed, black; fitted, red). (E) The normalized fluorescence intensity of each flow segment as a function of its mean bead rolling velocity. Data points are color-coded by shear stress, error bars indicate standard deviation of the fluorescence intensity in each segment; solid black line is the theoretical prediction of fluorescence intensity over bead velocity. (F) Calibration curve indicating mean instantaneous (blue) and rupture (red) force as a function of observed normalized fluorescence intensity (proportional to the fraction of ruptured TGT). (G) The mean instantaneous (blue) and rupture (red) force along the track. (H) Spatial mapping of the mean rupture force along the track. (I) The distribution of instantaneous force along the track. (J) The distribution of rupture force along the track. The image is split into a high force (14-19 pN) and a low force (0-2 pN) range.

While the mean instantaneous force is well defined, the mean rupture force should be interpreted more carefully, especially when a catch bond is involved. In contrast to a slip bond, the rupture force distribution is a bimodal distribution (Fig. 3D) instead of a unimodal distribution. Hence, changes of its expected value at different force loading rate comes mostly from the shift in the balance of its bimodal distribution. In contrast, slip bonds produces a unimodal rupture force distribution, and changes of expected value is more representative of a shift in its distribution. Because the instantaneous velocity of the bead correlates directly with the fluorescence intensity (Fig. 4E), and the molecular force distribution at any instantaneous velocity can be calculated from the model, we are able to

369 construct the full molecular force distribution along the entire track (Fig. 4I). While forces  
370 below  $\sim 4$  pN is the dominant population throughout the entire track with various shear  
371 stress (0.3 - 0.65 Pa), the force distribution in the 4-15 pN region is markedly more  
372 populated with increasing shear stress and rolling velocity (Fig. 4I). Similarly, under  
373 higher shear and velocity, the rupture force distribution moves from mainly  $< 1$  pN in the  
374 first, third, and last flow steps (Fig. 4J), to mostly between 15-18 pN, indicating a shift  
375 from mostly P-selectin/PSGL1 bond rupture ( $< 1$  pN) to mostly DNA unzipping (15-18  
376 pN). This is precisely indicative of the overall catch-bond behaviour of the hybrid P-  
377 selectin/PSGL1 and DNA unzipping system.

## 378 Discussion

379 Of the CAMs, there have been numerous studies and methods developed to characterize  
380 and monitor molecular forces on integrins (15, 16, 30–32), T-cell receptors (17, 18, 33),  
381 immunoglobulins (34, 35), cadherins (19–21), and others. However, the molecular forces  
382 of selectins in their physiological roles in rolling adhesion are the least understood. This is  
383 largely due to the unique challenges in observing selectin adhesion comparing to other  
384 families of CAMs. For example,  $\alpha 5 \beta 1$  integrins are involved in initial attachment, firm  
385 adhesion, and motility of a cell on the extracellular matrix with high affinity, high receptor  
386 density, and relatively slow dynamics (36, 37). This is a system well-suited for reversible  
387 digital molecular force sensors (16). In the case of cadherins, the low receptor density  
388 allows individual receptor and force sensor to be imaged and is well suited for reversible  
389 analog force sensors (21). Unlike most CAMs, selectin adhesion during cell rolling is  
390 transient and highly dynamic as the cells travel at speed reaching many micrometers per  
391 second. In addition, each P-selectin/PSGL1 interaction only forms and ruptures once for  
392 durations on the order of millisecond. Therefore, it is not possible to obtain repeated  
393 measurements of the same interaction over time. This makes it infeasible to apply  
394 molecular force probes successfully used in other adhesion systems to the selectin  
395 adhesion during rolling adhesion. To support rolling adhesion, the surface receptor density  
396 needs to reach a minimum of  $\sim 40$  per  $\mu\text{m}^2$ , much higher receptor density is required to  
397 support stable rolling. Hence this would require a high density of molecular force sensors  
398 on the surface, while at the same time, only  $\sim 10$ -40 receptors per  $\mu\text{m}^2$  are engaged in the  
399 adhesion. Reversible sensors that require FRET or quenching to report force do not have  
400 sufficient signal-to-noise ratio to report at this level. In addition, it is practically  
401 challenging to catch a rolling bead in the field of view in real time, and the field of view of  
402 a 100x lens for TIRF imaging isn't sufficiently large to allow us to follow a single bead  
403 over multiple shear stresses. Therefore, the only viable option to measure molecular forces  
404 in this system is using irreversible force sensors. It has high signal-to-noise ratio as the  
405 unruptured probes will not be fluorescently labelled, only probes subjected to force will  
406 rupture. Although not all molecular adhesion events produce a fluorescence signal, and  
407 this method will not measure the force history of a single receptor, the ensemble  
408 measurement allows us to extract precisely the distribution of molecular force. Our  
409 method allows for the extraction of quantitative force information from a record of force  
410 rupture events. The key to the success of this method is that we are measuring the  
411 fluorescence signal of a single bead across multiple shear stress. With the assistance of a  
412 model, this measurement allows us to make an individual calibration and subsequent  
413 quantification of molecular force. This is the first time that experimental force  
414 quantification was achieved using irreversible force sensors.

415 Contrary to previous observations where the cell rolling velocity decreases as the shear  
416 increases, which was attributed to a demonstration of the catch bond behaviour (2), our

417 model and experiment shows that in a stable rolling model system, the rolling velocity is  
418 exponentially dependent on the shear stress. The mean and rupture molecular forces on  
419 individual adhesion tethers also increase monotonically to shear stress. Indeed, the  
420 previous observation could be observing a regime where the adhesion interaction is so  
421 sparse due to the low shear, that the apparent higher velocity of the cell is closely  
422 following the flow of the fluid. And in that system, the bead is not under stable rolling, but  
423 transient attachment. This apparent cell velocity is a hallmark of catch bond. In a system  
424 where rolling is stable due to a high density of surface adhesion interactions, even though  
425 the catch bond is working, it does not exhibit the type of behaviour reported previously.

426 In order to quantify tension using TGT-based force sensor, one must know the force-  
427 dependent lifetime of the receptor-ligand pair it is coupled to. The fluorescence signal  
428 reported by the TGT is determined by the ratio of rupture probability of the DNA against  
429 the ligand. For the particular TGT sequence in the unzipping geometry coupled to P-  
430 selectin/PSGL1, the crossover of dissociation lifetime occurs at  $\sim 13.6$  pN (as shown in  
431 Fig.3c). In other words, at forces below 13.6 pN the dissociation events are predominantly  
432 between P-selectin and PSGL1, while above 13.6 pN, the TGT rupture events dominate,  
433 generating fluorescent signal. Furthermore, around the crossover point, the changes of  
434 TGT lifetime as a function of force is significantly faster than that of the P-  
435 selectin/PSGL1 interaction. This results in a sharp transition to primarily TGT rupturing  
436 and potentially limits the dynamic range of force sensing using TGT. Therefore, the  
437 choice of TGT sequence and rupture mode (i.e. unzipping or shearing) determines the  
438 molecular force range the assay is most sensitive to. To expand the dynamic range of  
439 TGT-based force sensors, a ratiometric approach using serially connected TGT can  
440 potentially be used (38).

441 In conclusion, we developed a new force quantification method specifically to address the  
442 challenges of studying molecular adhesion interactions that occur fast and only once. We  
443 combined the adhesion footprint assay and bead rolling as a model system to study  
444 interactions between P-selectin and PSGL1. The adhesion footprint allowed us to keep a  
445 fluorescent record of individual molecular adhesion events, where the fraction of ruptured  
446 TGTs is proportional to the observed fluorescence intensity. With the use of a model, we  
447 can use the intensity of the adhesion footprint to determine the molecular force  
448 distribution on the P-selectin/PSGL1 interactions during rolling. Our experimental results  
449 are in excellent agreement with our steady-state bead-rolling model. We found that with  
450 shear stresses increasing from 0.3 to 0.65 Pa, the fluorescence footprint intensity  
451 increased, corresponding to an increase of mean molecular rupture forces from  $\sim 5$  to 15  
452 pN. This quantitative adhesion footprint assay addressed a fundamental challenge in  
453 quantifying brief molecular adhesion events and allowed us to study selectin-mediated  
454 interactions during the highly dynamic rolling adhesion. We believe that this assay can be  
455 generally applied to quantify the molecular forces involved in other fast molecular  
456 adhesion interactions.

## 457 **Materials and Methods**

### 458 **Surface PEG passivation**

459 To minimize non-specific adhesion of beads, the glass surfaces of the coverslip and top  
460 slide were passivated with polyethylene glycol (PEG) following previously established  
461 protocol (27). Briefly, this was accomplished by first submerging the coverslips and slides  
462 in a piranha solution (3:1 sulfuric acid to hydrogen peroxide) for 30 minutes and then  
463 copiously rinsing first with milli-Q water and then with methanol. Following the methanol  
464 rinse, the coverslips/slides were placed in a 1% aminosilane solution (94 mL methanol, 1  
465

mL 3-(2-aminoethylamino)propyltrimethoxysilane (VWR, CAS# 1760-24-3), 5 mL glacial acetic acid) for 1 hour at 70°C. Once the silanization was complete, a methanol rinse and then a water rinse was done before putting the coverslips/slides in the oven. The coverslips/slides were placed in an oven at 110°C for 20 minutes and then left to cool to room temperature. Once at room temperature the coverslips/slides were passivated with PEG (Laysan Bio, mPEG-SVA, 5k) and/or biotinylated PEG (Laysan Bio, biotin-PEG-SVA, 5k) by placing 80 µL of 250 mg/mL PEG solution on one surface of the coverslips/slides and then placing a second coverslip/slide on-top of the PEG. The PEG passivation was left to react overnight at room temperature, and then the passivated coverslips/slides were washed with milli-Q water, dried with nitrogen and stored at -20°C under nitrogen until they were needed for an experiment. Each time coverslips/slides were PEGylated, 8 coverslips/slides were passivated and stored for future experiments.

### **Parallel plate flow chamber**

For each bead rolling experiment, a parallel plate flow chamber was constructed with a coverslip (Fisherbrand Premium, 12-548-5P), permanent double-sided tape (Scotch 3M237), and a top microscope slide (VWR, 48300-026). Prior to construction of the flow chamber, the coverslip was passivated with 20:1 PEG to PEG-biotin and the top slide was passivated with PEG. To create inlet and outlets for the flow chamber, a Dremel was used to drill holes on either end of the top slide. Channels were cut into the double-sided tape with a laser engraver (BOSS LASER) and then the tape was sandwiched between the coverslip and the top slide to create channels with dimensions 0.093 x 53.5 x 2.2mm. The flow chamber was then mounted on a custom-made bracket with inlet and outlet adapters allowing for a syringe pump to be used with the chamber. The syringe pump was used to apply laminar flow through the chamber at variable shear stresses between 0.30 and 0.65 Pa with a specific, user determined, flow series.

### **PSGL1 bead preparation**

Protein G-coated polystyrene beads (Spherotech, PGP-60-5) were functionalized with PSGL1-Fc Chimera (R&D systems, 3345-PS-050) as described previously (19). 10 µL of stock beads (0.5% w/v) were washed twice with PBS (pH 7.4). To wash the beads, they were centrifuged at 3000 g for 15 minutes, the supernatant was discarded, and the beads were resuspended in PBS. Following the second resuspension in PBS, the beads were spun down a third time and resuspended in 50 µL of 100 µg/mL PSGL1-Fc Chimera and left to incubate in the PSGL1 solution for >2 hours on a rotator at room temperature. Prior to each experiment, the beads were washed with T50M5C2 (10 mM Tris, 50 mM NaCl, 5 mM MgCl<sub>2</sub> and 2 mM CaCl<sub>2</sub>) to remove excess PSGL1 and prepare for rolling.

### **Preparation of TGT for adhesion footprint assay**

The TGT DNA construct used for the bead rolling adhesion footprint assay was based on previously described protocols (27). The assay involved a biotinylated bottom strand, a protein G functionalized top strand, a fluorescently labeled probe strand, and a blocker top strand. The following oligonucleotides and modifications were ordered from Integrated DNA Technologies (IDT):

Biotin bottom stand: 5'-/5BiotinTEG/ TTTTT CCCTCCTGCGTCGCCCCGG-3'

Thiol top strand: 5'-CCGGGCGACGCAGGAGGG TTTTT /3ThioMC3-D/-3'

Blocker top strand: 5'-CCGGGCGACGCAGGAGGG-3'

Probe strand: 5'-CCGGGCGACGCAGG /3Cy3Sp/-3'

516 The top strand was conjugated to His-tagged Protein G (Abcam, ab49807) through a  
517 sulfo-SMCC (ThermoFisher, 22322) hetero-bifunctional crosslinker that linked the 3' thiol  
518 on the top strand to an amine moiety of the Protein G. The conjugation was performed  
519 following the protocols described by the sulfo-SMCC manufacturer. Following  
520 conjugation, the product was purified using His-Tag Isolation and Pulldown Dynabeads.  
521 The conjugated product (Top-PG) was hybridized to the bottom strand by mixing the  
522 oligos at a molar ratio of 2:1 (400:200 nM) in T50M5C2 buffer ensuring an excess of  
523 Top-PG. The hybridization was performed at room temperature for 2 hours prior to  
524 experiments resulting in the full biotin and protein G functionalized TGT (TGT-biot-PG).  
525

### 526 **Adhesion footprint assay**

527 The parallel plate flow chamber was functionalized by incubating BSA (TOCRIS  
528 Bioscience, 9048-46-8), streptavidin (Cedarlane, CL1005-01-5MG), TGT-biot-PG and P-  
529 selectin Fc chimera (R&D Systems, 137-PS-050). BSA (10 mg/mL) was flowed into the  
530 chamber and incubated for 15 minutes to further passivate the PEGylated surface ensuring  
531 minimal non-specific interaction with the glass substrate. The excess BSA was washed out  
532 of the chamber with 200  $\mu$ L T50M5C2 buffer at a flow rate of 2 mL/hr controlled by a  
533 syringe pump (Harvard apparatus). All wash steps were performed in this manner.  
534 Streptavidin (100  $\mu$ g/mL) was then flowed into the chamber and incubated for 15 minutes  
535 to bind to the biotin on the PEG/PEG-biotin surface. The streptavidin was washed out with  
536 T50M5C2 and then TGT-biot-PG (200 nM) was flowed into the chamber and incubated  
537 for 15 minutes allowing the streptavidin on the surface to bind to the biotin on the TGT-  
538 biot-PG. Excess TGT-biot-PG was washed out with T50M5C2 and then P-selectin Fc  
539 chimera (10  $\mu$ g/mL) was incubated for 15 minutes allowing the Protein G to bind to the  
540 immunoglobulin G (IgG) Fc domain of the P-selectin Fc chimera. Excess P-selectin was  
541 then washed out with T50M5C2. Finally, blocker top strand DNA (200 nM) was  
542 incubated in the chamber for 15 minutes to hybridize to any remaining "empty" bottom  
543 strand DNA on the surface that failed to hybridize to the Top-PG. This step ensured that  
544 there was minimal ssDNA on the surface of the chamber.  
545

546 Once the chamber was functionalized with P-selectin and TGT, the PSGL1 beads were  
547 flowed into the chamber and left to settle for 5 minutes. A syringe pump was then used to  
548 apply a specific flow series of shear stresses in the range of 0.30 and 0.65 Pa causing the  
549 PSGL1 beads to roll on the P-selectin/TGT surface. The rolling beads were observed on a  
550 home-made darkfield microscope with a 10X objective and the images were recorded at  
551 30 fps. Following bead rolling, the probe strand (100 nM) was flowed into the chamber in  
552 T50M5C2 buffer and incubated for 5 minutes to label the ruptured TGTs allowing for  
553 observation of the fluorescence tracks left by the rolling beads. The excess probe strand  
554 was washed out of the chamber with imaging buffer (40 mM NaCl, 160 mM Tris, 10%  
555 (m/v) Glucose, 1.12 mg/mL Glucose Oxidase (Sigma, G7141-50KU), 0.08 mg/mL  
556 catalase (Sigma, C9322), pH 8.0) prior to fluorescence imaging.  
557

### 558 **TIRF imaging and fluorescence image processing**

559 The sample was excited with a 532nm laser (Spectra-Physics, Excelsior 532) and observed  
560 through TIRF microscopy on an Olympus IX83 inverted microscope. The fluorescence  
561 images were acquired with an Andor iXon Ultra 897 EMCCD camera. Because the length  
562 of fluorescence track from each bead is on the order of mm, while the TIRF field-of-view  
563 is only  $\sim 80 \times 80 \mu\text{m}^2$ ,  $\sim 2000$ - $3000$  individual images were acquired with the motorized XY  
564 stage to produce a large stitched image. The microscope was programmed to move so that  
565 there was a 10% overlap between adjacent images for image registration during tiling.

566 Following image acquisition, additional processing was done to correct for uneven  
567 illumination in the original images ( $I_0$ ) following the protocol described previously (27).  
568 During each experiment, a background image ( $I_{bg}$ ) was acquired by taking an image with  
569 the illumination turned off. This was used to do a background subtraction ( $I_0 - I_{bg}$ ) to  
570 obtain the true fluorescence signal of each image. To determine the underlying  
571 illumination profile ( $I_{illumination}$ ), the average of all the background subtracted images  $\langle I_0 -$   
572  $I_{bg} \rangle$ , was calculated and normalized its maximum to 1. The flattened illumination profile  
573 ( $I_{flat}$ ) was calculated using the formula:  $I_{flat} = (I_0 - I_{bg})/I_{illumination}$ . The flattened images  
574 were then used to construct the final stitched image using the ImageJ Grid/Collection  
575 stitching plugin with linear blending selected as the chosen fusion method.  
576

### 577 **Fluorescence track processing and analysis**

578 Fluorescence track processing and analysis was performed on the stitched image through  
579 the following steps: track detection, tracking, isolation, and analysis. Track detection was  
580 done to locate the pixels corresponding to fluorescence tracks. This was accomplished by  
581 finding the peak location of each column in the image. The detected peaks were then  
582 representative of track cross-sections and the position of the peak maxima was recorded as  
583 a point belonging to a fluorescence track. During detection, thresholds were applied to  
584 only detected peaks that were  $\sim 1.5$  track widths away from each other. Track width was  
585 manually determined by counting the number of pixels spanning the cross section of a  
586 track. This peak proximity threshold ensured that the fluorescence intensities were not  
587 influence by neighbouring tracks. Upon acquiring the pixel coordinates belonging to the  
588 fluorescence tracks, custom-written MATLAB code was used to assign coordinates to  
589 tracks and sequentially append each coordinate to its corresponding track. Track  
590 assignment was determined based on the proximity of a coordinate to the end position of  
591 the neighboring tracks. Each track was then cropped out of the stitched image by  
592 extracting the track coordinates  $\pm$  half the track width for the full length of the track.  
593 Fluorescence intensity traces of each track was then done by calculating the mean  
594 intensity of each column along the length of the track.  
595

596 Once the intensity traces were obtained for each track, they were subdivided into segments  
597 corresponding to the flow rates applied during the rolling assay. This segmentation was  
598 done by determining abrupt changes in the mean of a dataset. This function was sensitive  
599 enough to detect abrupt changes in the fluorescence intensity along the length of the tracks  
600 corresponding to changes in flow rate. The accuracy of the segmentation was verified by a  
601 comparison with the segments in the applied flow series. The detected segments were then  
602 used to determine the average intensity and the bead velocity corresponding to the applied  
603 flow rates.  
604

### 605 **Bead detection and tracking**

606 Bead rolling velocity was extracted from the 10x darkfield images with custom-written  
607 MATLAB code that detects and tracks the position of individual beads over time. Bead  
608 detection was achieved using the built-in MATLAB function, *imfindcircles*, that uses a  
609 circular Hough transform to find circles in an image. This function works exceptionally  
610 well with beads as they appear to be perfect circles under the microscope. Once the beads  
611 were detected, the centroid position of each bead was recorded on a frame-by-frame basis.  
612 In a similar fashion to how the fluorescence tracks were tracked, for every frame, each  
613 bead was assigned to a track. This allowed for the analysis of each bead's displacement on  
614 a frame-by-frame basis, and hence, the calculation of the bead instantaneous velocity.

615 With this approach, we were able to calculate the observed bead rolling velocity and use it  
616 as a standard to compare the fluorescence track velocities with.

### 617 **Super-resolution Adhesion Footprint**

618 To acquire a super-resolution image of the bead tracks, the probe strand used for  
619 diffraction limited images was replaced with the following sequence purchased from IDT:

620 DNA PAINT imager strand: 5'-GAGGGAAATT/3Cy3Sp/-3'

621  
622 The DNA PAINT imager strand was designed following literature recommendations (39).  
623 Immediately following bead rolling, 500pM of DNA PAINT imager strand in DNA  
624 PAINT buffer (0.05% Tween-20, 75 mM MgCl<sub>2</sub>, 5 mM Tris, and 1 mM EDTA) was  
625 added to the chamber. Upon adding the imager strand, the sample was observed through  
626 TIRF with the same microscope, camera and laser used to image the diffraction-limited  
627 fluorescence tracks. The DNA PAINT “blinking” was imaged for 50,000 frames at an  
628 exposure time of 25ms. Upon acquiring the fluorescence images, the ‘Picasso’ software  
629 package (40) was used to identify the position of all the fluorophores in every frame and  
630 then construct the super-resolution image. The final super-resolution image was then drift  
631 corrected with ‘Picasso’ through redundant cross-correlation.  
632  
633

### 634 **Statistical analysis**

635 MATLAB was used to calculate the Pearson correlation coefficient.

## 636 **H2: Supplementary Materials**

637 Note S1. Derivation of the steady state model.

638 Fig. S1. Bead rolling velocity scales exponentially to shear stress.

## 639 **References**

- 640 1. S. Nourshargh, R. Alon, Leukocyte Migration into Inflamed Tissues. *Immunity*. **41** (2014),  
641 pp. 694–707.
- 642 2. R. P. McEver, C. Zhu, Rolling cell adhesion. *Annu. Rev. Cell Dev. Biol.* **26** (2010), pp.  
643 363–396.
- 644 3. A. Zarbock, K. Ley, Neutrophil Adhesion and Activation under Flow. *Microcirculation*.  
645 **16**, 31–42 (2009).
- 646 4. J. Fritz, A. G. Katopodis, F. Kolbinger, D. Anselmetti, Force-mediated kinetics of single P-  
647 selectin/ligand complexes observed by atomic force microscopy. *Proc. Natl. Acad. Sci. U.*  
648 *S. A.* **95**, 12283–12288 (1998).
- 649 5. J. A. Simmons, W. J. Bailey, M. D. Greenfield, T. E. Shelly, E. Coscia, P. D. Phillips, J. C.  
650 Fentress, Lifetime of the p-selectin-carbohydrate bond and its response to tensile force in  
651 hydrodynamic flow. *Nature*. **374** (1995), pp. 539–542.
- 652 6. P. Mehta, R. D. Cummings, R. P. McEver, Affinity and kinetic analysis of P-selectin  
653 binding to P-selectin glycoprotein ligand-1. *J. Biol. Chem.* **273**, 32506–32513 (1998).
- 654 7. B. T. Marshall, M. Long, J. W. Piper, T. Yago, R. P. McEver, C. Zhu, Direct observation  
655 of catch bonds involving cell-adhesion molecules. *Nature*. **423**, 190–193 (2003).
- 656 8. M. T. Beste, D. A. Hammer, Selectin catch-slip kinetics encode shear threshold adhesive  
657 behavior of rolling leukocytes. *Proc. Natl. Acad. Sci. U. S. A.* **105**, 20716–20721 (2008).
- 658 9. H. B. Wang, J. T. Wang, L. Zhang, Z. H. Geng, W. L. Xu, T. Xu, Y. Huo, X. Zhu, E. F.  
659 Plow, M. Chen, J. G. Geng, P-selectin primes leukocyte integrin activation during  
660 inflammation. *Nat. Immunol.* **8**, 882–892 (2007).
- 661  
662  
663  
664



- 665 10. Y. Zhang, G. Sun, S. Lü, N. Li, M. Long, Low spring constant regulates P-selectin-PSGL-1  
666 bond rupture. *Biophys. J.* **95**, 5439–5448 (2008).
- 667 11. W. Hanley, O. McCarty, S. Jadhav, Y. Tseng, D. Wirtz, K. Konstantopoulos, Single  
668 molecule characterization of P-selectin/ligand binding. *J. Biol. Chem.* **278**, 10556–10561  
669 (2003).
- 670 12. S. Lü, Z. Ye, C. Zhu, M. Long, Quantifying the effects of contact duration, loading rate,  
671 and approach velocity on P-selectin-PSGL-1 interactions using AFM. *Polymer (Guildf)*.  
672 **47**, 2539–2547 (2006).
- 673 13. E. Evans, A. Leung, V. Heinrich, C. Zhu, Mechanical switching and coupling between two  
674 dissociation pathways in a P-selectin adhesion bond. *Proc. Natl. Acad. Sci. U. S. A.* **101**,  
675 11281–11286 (2004).
- 676 14. L. J. Rinko, M. B. Lawrence, W. H. Guilford, The Molecular Mechanics of P- and L-  
677 Selectin Lectin Domains Binding to PSGL-1. *Biophys. J.* **86**, 544–554 (2004).
- 678 15. M. Morimatsu, A. H. Mekhdjian, A. S. Adhikari, A. R. Dunn, Molecular tension sensors  
679 report forces generated by single integrin molecules in living cells. *Nano Lett.* **13**, 3985–  
680 3989 (2013).
- 681 16. Y. Zhang, C. Ge, C. Zhu, K. Salaita, DNA-based digital tension probes reveal integrin  
682 forces during early cell adhesion. *Nat. Commun.* **5**, 1–10 (2014).
- 683 17. Y. Liu, L. Blanchfield, V. Pui-Yan Ma, R. Andargachew, K. Galior, Z. Liu, B. Evavold, K.  
684 Salaita, DNA-based nanoparticle tension sensors reveal that T-cell receptors transmit  
685 defined pN forces to their antigens for enhanced fidelity. *Proc. Natl. Acad. Sci. U. S. A.*  
686 **113**, 5610–5615 (2016).
- 687 18. V. P. Y. Ma, Y. Liu, L. Blanchfield, H. Su, B. D. Evavold, K. Salaita, Ratiometric tension  
688 probes for mapping receptor forces and clustering at intermembrane junctions. *Nano Lett.*  
689 **16**, 4552–4559 (2016).
- 690 19. X. Wang, Z. Rahil, I. T. S. Li, F. Chowdhury, D. E. Leckband, Y. R. Chemla, T. Ha,  
691 Constructing modular and universal single molecule tension sensor using protein G to  
692 study mechano-sensitive receptors. *Sci. Rep.* **6**, 1–10 (2016).
- 693 20. D. Eder, K. Basler, C. M. Aegerter, Challenging FRET-based E-Cadherin force  
694 measurements in *Drosophila*. *Sci. Rep.* **7**, 1–12 (2017).
- 695 21. D. E. Conway, M. T. Breckenridge, E. Hinde, E. Gratton, C. S. Chen, M. A. Schwartz,  
696 Fluid shear stress on endothelial cells modulates mechanical tension across VE-cadherin  
697 and PECAM-1. *Curr. Biol.* **23**, 1024–1030 (2013).
- 698 22. F. Meng, T. M. Suchyna, E. Lazakovitch, R. M. Gronostajski, F. Sachs, Real time FRET  
699 based detection of mechanical stress in cytoskeletal and extracellular matrix proteins. *Cell.*  
700 *Mol. Bioeng.* **4**, 148–159 (2011).
- 701 23. S. K. Bhatia, M. R. King, D. A. Hammer, The state diagram for cell adhesion mediated by  
702 two receptors. *Biophys. J.* **84**, 2671–2690 (2003).
- 703 24. E. Evans, A. Leung, D. Hammer, S. Simon, Chemically distinct transition states govern  
704 rapid dissociation of single L-selectin bonds under force. *Proc. Natl. Acad. Sci. U. S. A.* **98**,  
705 3784–3789 (2001).
- 706 25. H. Läubli, L. Borsig, Altered Cell Adhesion and Glycosylation Promote Cancer Immune  
707 Suppression and Metastasis. *Front. Immunol.* **10** (2019), p. 2120.
- 708 26. A. Yasunaga, Y. Murad, I. T. S. Li, Quantifying molecular tension-classifications,  
709 interpretations and limitations of force sensors. *Phys. Biol.* **17** (2020), p. 011001.
- 710 27. I. T. S. Li, T. Ha, Y. R. Chemla, Mapping cell surface adhesion by rotation tracking and  
711 adhesion footprinting. *Sci. Rep.* **7**, 1–11 (2017).
- 712 28. X. Wang, T. Ha, Defining single molecular forces required to activate integrin and Notch  
713 signaling. *Science (80-. )*. **340**, 991–994 (2013).
- 714 29. R. Killick, P. Fearnhead, I. A. Eckley, Optimal detection of changepoints with a linear

- 715 computational cost. *J. Am. Stat. Assoc.* **107**, 1590–1598 (2012).
- 716 30. D. R. Stabley, C. Jurchenko, S. S. Marshall, K. S. Salaita, Visualizing mechanical tension  
717 across membrane receptors with a fluorescent sensor. *Nat. Methods.* **9**, 64–67 (2012).
- 718 31. Y. Liu, R. Medda, Z. Liu, K. Galior, K. Yehl, J. P. Spatz, E. A. Cavalcanti-Adam, K.  
719 Salaita, Nanoparticle tension probes patterned at the nanoscale: Impact of integrin  
720 clustering on force transmission. *Nano Lett.* **14**, 5539–5546 (2014).
- 721 32. F. Li, S. D. Redick, H. P. Erickson, V. T. Moy, Force measurements of the  $\alpha 5\beta 1$  integrin-  
722 fibronectin interaction. *Biophys. J.* **84**, 1252–1262 (2003).
- 723 33. K. H. Hu, M. J. Butte, T cell activation requires force generation. *J. Cell Biol.* **213**, 535–  
724 542 (2016).
- 725 34. Z. Wan, X. Chen, H. Chen, Q. Ji, Y. Chen, J. Wang, Y. Cao, F. Wang, J. Lou, Z. Tang, W.  
726 Liu, The activation of IgM- or isotype-switched IgG- and IgE-BCR exhibits distinct  
727 mechanical force sensitivity and threshold. *Elife.* **4** (2015), doi:10.7554/eLife.06925.
- 728 35. N. Yeow, R. F. Tabor, G. Garnier, Mapping the distribution of specific antibody interaction  
729 forces on individual red blood cells. *Sci. Rep.* **7**, 1–7 (2017).
- 730 36. R. Pankov, E. Cukierman, B. Z. Katz, K. Matsumoto, D. C. Lin, S. Lin, C. Hahn, K. M.  
731 Yamada, Integrin dynamics and matrix assembly: Tensin-dependent translocation of  $\alpha 5\beta 1$   
732 integrins promotes early fibronectin fibrillogenesis. *J. Cell Biol.* **148**, 1075–1090 (2000).
- 733 37. J. Takagi, K. Stokovich, T. A. Springer, T. Walz, Structure of integrin  $\alpha 5\beta 1$  in complex  
734 with fibronectin. *EMBO J.* **22**, 4607–4615 (2003).
- 735 38. Y. Murad, I. T. S. Li, Quantifying Molecular Forces with Serially Connected Force  
736 Sensors. *Biophys. J.* **116**, 1282–1291 (2019).
- 737 39. M. Dai, in *Methods in Molecular Biology* (Humana Press Inc., 2017;  
738 <https://pubmed.ncbi.nlm.nih.gov/27813009/>), vol. 1500, pp. 185–202.
- 739 40. J. Schnitzbauer, M. T. Strauss, T. Schlichthaerle, F. Schueder, R. Jungmann, Super-  
740 resolution microscopy with DNA-PAINT. *Nat. Protoc.* **12**, 1198–1228 (2017).

741  
742 **Acknowledgments: General:** we would like to thank Yousif Murad for discussions. **Funding:**  
743 we thank the Natural Sciences and Engineering Research Council of Canada (NSERC  
744 RGPIN-2017-04407), Canada Foundation for Innovation (CFI 35492), and the Michael  
745 Smith Foundation for Health Research (Scholar Award) for support. **Author**  
746 **contributions:** AY and IL designed the experiment, AY performed the experiment and  
747 analyzed data, IL developed the model, AY and IL drafted the manuscript. **Competing**  
748 **interests:** none. **Data and materials availability:** all data available upon request.  
749

## Figures

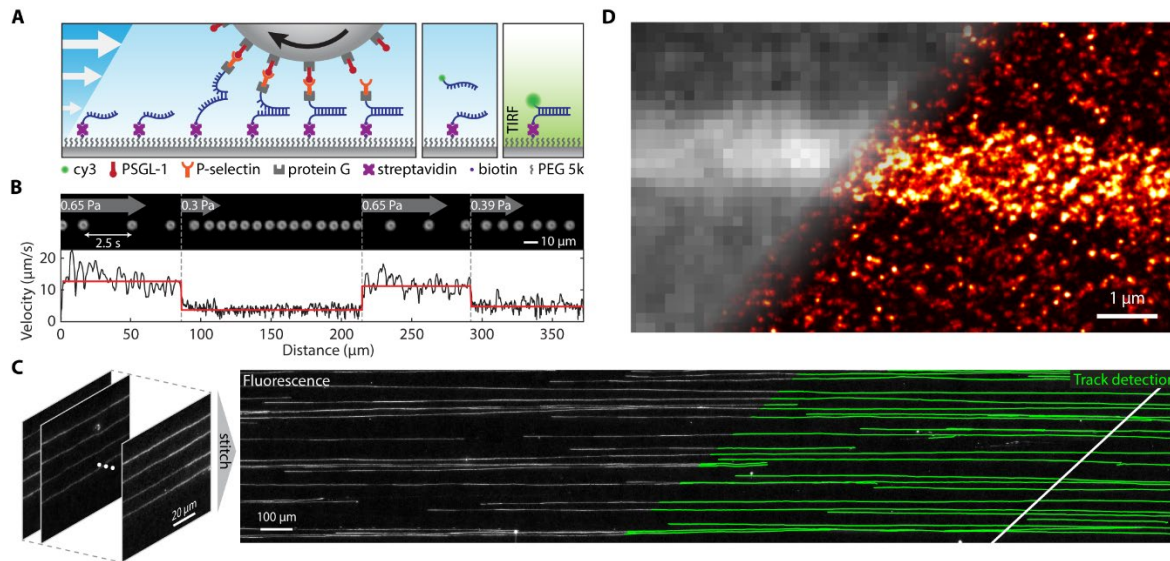

**Fig. 1. Bead rolling adhesion with adhesion footprint assay. (A).** Schematic of the rolling adhesion footprint assay. A PSGL1 coated bead rolls on a surface by binding to P-selectin and eventually rupturing the conjugated DNA duplex, leaving a single stranded DNA (ssDNA) on the surface corresponding to the precise locations of each adhesion event. This adhesion footprint assay leaves a trail of ssDNA on the surface that can be fluorescently labeled with a complementary strand and further imaged with TIRF microscopy to observe the tracks left by the rolling beads. **(B).** Darkfield imaging of bead rolling under altering steps of shear stress. The top image imposes snapshots of a bead every 2.5 seconds in response to the different shear stresses. The bottom panel shows the corresponding instantaneous velocity (black) and mean velocity (red). **(C).** A stitched image showing the fluorescence adhesion footprint tracks (left) that are observed after PSGL1 beads roll on a P-selectin/TGT surface. Individual tracks (green lines) are detected (right), enabling isolation and analysis of the fluorescence intensity trajectory of individual beads. **(D).** The diffraction limited and DNA PAINT super-resolution image of a single fluorescence track.

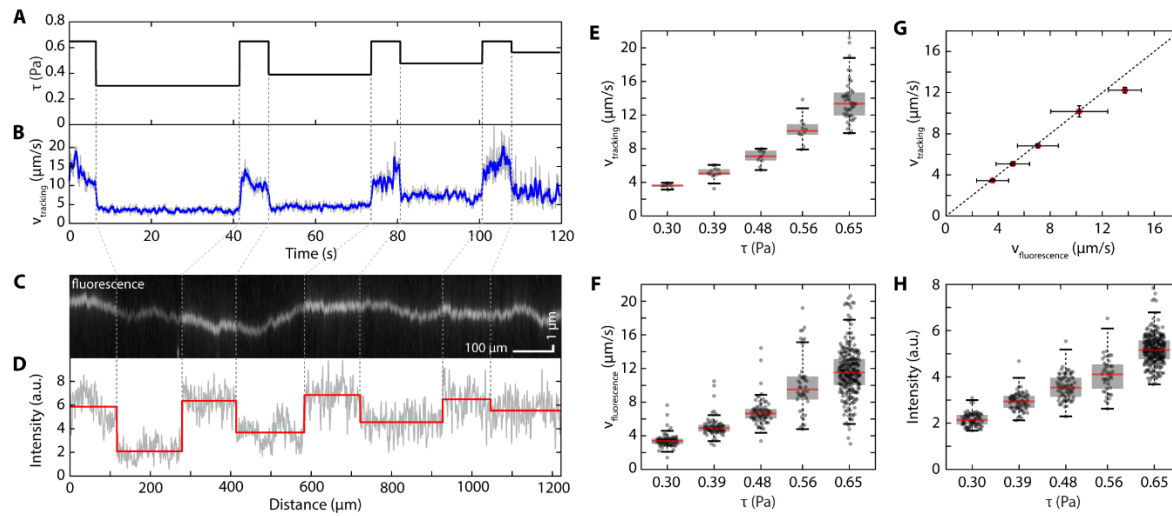

**Fig. 2. Shear stress dictates bead rolling velocity and fluorescence track intensity.** (A) Syringe pump-controlled flow series applied to the rolling beads. (B) Population mean rolling velocity of PSGL1 coated beads over time resulting from the applied flow series shown in (A). (C) Representative fluorescence track imaged with TIRF after rolling beads on the TGT/P-selectin surface with the flow series shown in (A). (D) Intensity trace along the length of the track showing raw data in gray and the mean intensity at each shear stress from (A) in red. (E) Mean tracking bead velocity as a function of shear stress. Tracking bead velocity was determined through single particle tracking of rolling beads. (F) Mean fluorescence bead velocity as a function of shear stress. Fluorescence bead velocity was determined by the length of each segment seen in a fluorescence track and the duration corresponding to the segments. (G) Scatter plot of fluorescence velocity vs tracking bead velocity showing a positive correlation ( $r = 0.99$ ,  $p < 0.001$ ) with error bars representing standard error of the mean. (H) Fluorescence track intensity as a function of shear stress.

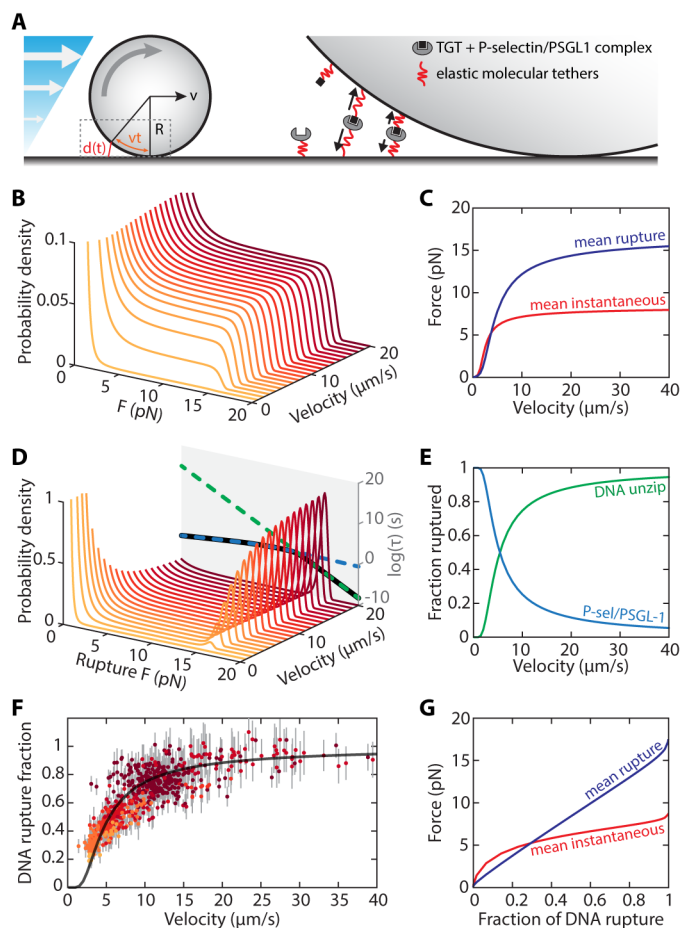

**Fig. 3. Modelling force distribution in the adhesion footprint assay.** (A) The steady-state bead rolling model with parameters indicated in the schematic. The zoomed-in picture shows the molecular tethers are being stretched and dissociate as the bead roll forward, mimicking a force-extension experiment that acts on many tethers. (B) Instantaneous force distribution at different bead rolling velocity. (C) The expected instantaneous (red) and rupture (blue) force as a function of bead velocity. (D) Rupture force distribution at different bead rolling velocity. The force-dependent life-time of P-selectin/PSGL1 (blue dash), DNA reporter unzipping (green dash), and the overall bond rupture profile (black). (E) The fraction of bond rupture due to DNA unzipping and P-selectin/PSGL1 dissociation at different bead velocities. (F) Normalized, track fluorescence intensity as a function of velocity of individual beads, each data point is coloured by the shear stress it experiences under. Error bars indicate standard deviation of the fluorescence intensity along each track. Solid black line is the calculated DNA rupture fraction as a function of bead velocity from the model. (G) The expected rupture (blue) and instantaneous (red) force as a

795

function of the DNA rupture fraction, predicted by the model. This is essentially a force-

796

fluorescence calibration curve.

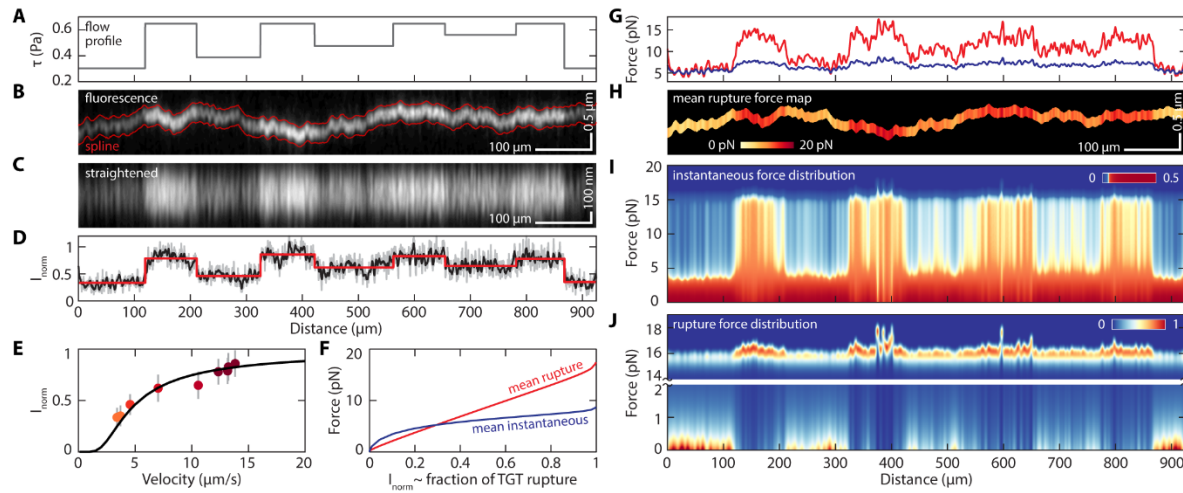

797

**Fig. 4. Mapping molecular force along a single rolling adhesion track. (A)** Shear stress profile

798

799 over time. **(B)** A single fluorescence track made by a bead rolling under this the flow profile

800

801 shown in (A) where the spline is marked in red. **(C)** Straightened fluorescence track seen in (B)

802

803 showing regions of high and low fluorescence intensity corresponding to the shear stress profile in

804

805 **(A)**. **(D)** The normalized total fluorescence intensity along the track (raw, gray; smoothed, black;

806

807 fitted, red). **(E)** The normalized fluorescence intensity of each flow segment as a function of its

808

809 mean bead rolling velocity. Data points are color-coded by shear stress, error bars indicate

810

811 standard deviation of the fluorescence intensity in each segment; solid black line is the theoretical

812

813 prediction of fluorescence intensity over bead velocity. **(F)** calibration curve indicating mean

814

instantaneous (blue) and rupture (red) force as a function of observed normalized fluorescence

815

816 intensity (proportional to the fraction of ruptured TGT). **(G)** The mean instantaneous (blue) and

817

818 rupture (red) force along the track. **(H)** Spatial mapping of the mean rupture force along the track.

819

820 **(I)** The distribution of instantaneous force along the track. **(J)** The distribution of rupture force

821

822 along the track. The image is split into a high force (14-19 pN) and a low force (0-2 pN) range.

823

812

813

814

## 815 Supplementary Materials

### 816 **Note S1. Derivation of the steady state model**

817 In steady state where the rolling velocity is constant, we assume the probability density of  
 818 the instantaneous molecular force across all molecular tethers is  $P(f)$ , which is time  
 819 invariant. The goal of this derivation is to develop the analytical form of  $P(f)$  as well as the  
 820 rupture force distribution  $P_r(f)$ .

821 To start, one can follow the evolution of any particular fraction of molecular tethers  
 822 corresponding to a particular force  $f$  over time. Over an infinitesimal period of  $dt$  ( $dt \ll 1$ ),  
 823 the bead will roll forward, stretching existing tethers further and increase the force across  
 824 them by  $df$  ( $df \ll f$ ). At the same time, the survival probability of these tethers under a near  
 825 constant force  $f$  is defined by an exponential decay function characteristic of the overall  
 826 force-dependent lifetime  $\tau(f)$  of the adhesion complex. Therefore, the time evolution of a  
 827 particular set of molecular tether's PDF is defined by:

$$P(f) \exp\left(-\frac{dt}{\tau(f)}\right) = P(f + df) \quad (\text{A1})$$

828 Subtract both sides of the equation by  $P(f)$  and divide by  $df$ :

$$\frac{P(f + df) - P(f)}{df} = \frac{P(f) \left( \exp\left(-\frac{dt}{\tau(f)}\right) - 1 \right)}{df} \quad (\text{A2})$$

829 Based on the geometry of bead and the rolling velocity, an individual tether is extended by  
 830 a pre-defined force-loading curve defined by  $f(t)$  and we define its inverse function as  $g(f)$ ,  
 831 i.e.  $t = f^{-1}(f) = g(f)$ , hence:

$$\frac{dt}{df} = \dot{g}(f) \quad (\text{A3})$$

832 At the limit of  $dt$  approaching 0, A2 becomes:

$$\frac{\partial}{\partial f} P(f) = -\frac{\dot{g}(f)}{\tau(f)} P(f) \quad (\text{A4})$$

833 Solving this differential equation gives:

$$P(f) = c \exp\left(-\int \frac{\dot{g}(f)}{\tau(f)} df\right) \quad (\text{A5})$$

834 To evaluate this integral numerically, we define:

$$Q(f) = \int \frac{\dot{g}(f)}{\tau(f)} df \quad (\text{A6})$$

835 Hence,

$$P(f) = \int_0^f \frac{\dot{g}(f)}{\tau(f)} df + Q(0) \quad (\text{A7})$$

836 Therefore, we arrive at the general form of  $P(f)$  that can be numerically evaluated (Figure  
 837 3b):

$$P(f) = C_1 \exp\left(-\int_0^f \frac{\dot{g}(f)}{\tau(f)} df\right) \quad (\text{A8})$$

838 where  $C_1$  is a constant that can be numerically determined to normalize  $P(f)$ . Given this  
839 instantaneous force distribution function, we can also evaluate the steady-state rupture rate  
840 of the adhesion complex at different forces, which is essentially the distribution of rupture  
841 forces:

$$P_r(f) = \frac{C_2}{\tau(f)} \exp\left(-\int_0^f \frac{\dot{g}(f)}{\tau(f)} df\right) \quad (\text{A9})$$

842 where  $C_2$  is the normalization constant.

843 In our case where multiple components (i.e. P-selectin/PSGL1 and TGT) can rupture, the  
844 overall  $\tau(f)$  can be easily defined by  $\tau_i(f)$  of the  $i^{\text{th}}$  components in the series of adhesion  
845 bond within the complex:

$$\frac{1}{\tau_{total}(f)} = \sum_i \frac{1}{\tau_i(f)} \quad (\text{A10})$$

846 Furthermore, given the geometric constrains and assuming no slipping conditions, the  
847 molecular end-to-end extension as a function of time can be defined by:

$$d(t) = \sqrt{\left(vt - R \sin \frac{vt}{R}\right)^2 + R^2 \left(1 - \cos \frac{vt}{R}\right)^2} \quad (\text{A11})$$

848 where  $R$  is the radius of the sphere,  $v$  is the linear velocity of the sphere. Given this  
849 information, we can then construct the force loading profile as a function of time of the  
850 tethers, using the Worm-Like Chain (WLC) model.

851  
852 Given the above formulation, the size of the rolling sphere, its velocity, and the force-  
853 dependent dissociation characteristics of the adhesion complex, the instantaneous  
854 molecular force distribution and rupture force distribution can be numerically evaluated.  
855  
856  
857  
858  
859  
860  
861  
862  
863  
864  
865  
866  
867  
868  
869  
870  
871  
872  
873  
874  
875  
876



877

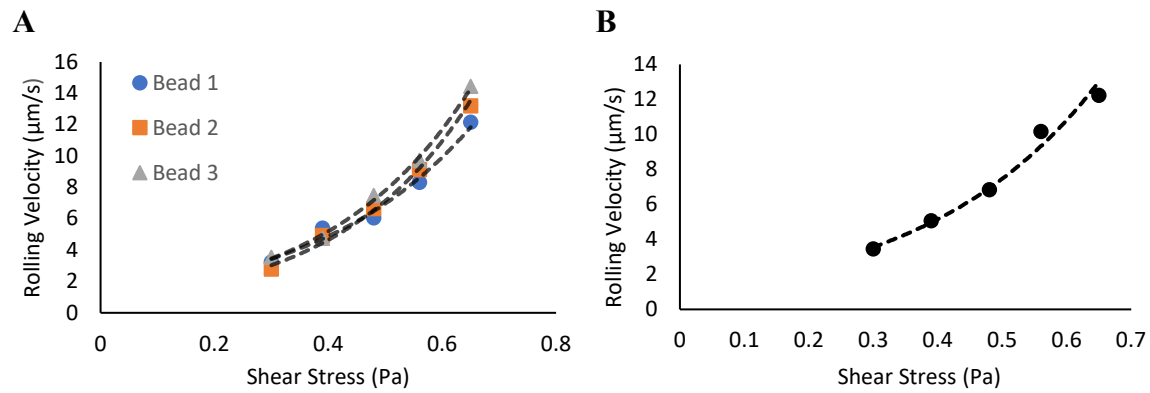

878

879

880

881

882

883

884

**Fig. S1. Bead rolling velocity scales exponentially to shear stress. (A)** Individual bead mean rolling velocity as a function of shear stress. Exponential fit yields R-squared values of 0.970, 0.987, and 0.996 for beads 1,2 and 3, respectively. The three beads are representative of the population. **(B)** Population mean rolling velocity as a function of shear stress. Exponential fit yields an R-squared value of 0.988.
